# Supplementary material for: Regioselective conversions of H4pdta (1,2-propanediaminetetraacetic acid) and H4eed3a to their triacetates on peroxotitanates
Source: Royal Society of Chemistry journal article supplement (doi:10.1039/c9dt03589c), 2019-01-01
Supplement: c9dt03589c1.pdf [file c9dt03589c1.pdf]

## Supporting Information

### Regioselective conversions of H<sub>4</sub>pdta (1,2-propanediaminetetraacetic acid) and H<sub>4</sub>eed3a to their triacetates on peroxotitanates

Yu-Chen Yang,<sup>a,b,#,\*</sup> Qiong-Xin Liu,<sup>b,#</sup> Zhao-Hui Zhou,<sup>b,\*</sup> Hui-Lin Wan<sup>b</sup>

<sup>a</sup> Shaanxi Key Laboratory of Natural Products & Chemical Biology, College of Chemistry & Pharmacy, Northwest A&F University, Yangling 712100, China. E-mail: ycyang@nwfau.edu.cn; Tel: +86 29 87092662; Fax: +86 29 87092662.

<sup>b</sup> State Key Laboratory of Physical Chemistry of Solid Surfaces, College of Chemistry and Chemical Engineering, Xiamen University, Xiamen 361005, China. E-mail: zhzhou@xmu.edu.cn; Tel: +86 592 2184531; Fax: +86 592 2183047.

Figure S1. UV spectra of (NH<sub>4</sub>)[Ti(O<sub>2</sub>)(Hpdt)]·H<sub>2</sub>O (**1**), (NH<sub>4</sub>)<sub>3</sub>[Ti(O<sub>2</sub>)(pdta)H(pdta)(O<sub>2</sub>)Ti]·7H<sub>2</sub>O (**2**), (NH<sub>4</sub>)[Ti(O<sub>2</sub>)(pd3a)]·H<sub>2</sub>O (**3**) and (NH<sub>4</sub>)[Ti(O<sub>2</sub>)(Heed3a)]·H<sub>2</sub>O (**5**)

Figure S2. IR spectra of peroxotitanium(IV) complexes: (NH<sub>4</sub>)[Ti(O<sub>2</sub>)(Hpdt)]·H<sub>2</sub>O (**1**), (NH<sub>4</sub>)<sub>3</sub>[Ti(O<sub>2</sub>)(pdta)H(pdta)(O<sub>2</sub>)Ti]·7H<sub>2</sub>O (**2**) and (NH<sub>4</sub>)[Ti(O<sub>2</sub>)(pd3a)]·H<sub>2</sub>O (**3**)

Figure S3. IR spectra of (NH<sub>4</sub>)[Ti(O<sub>2</sub>)(Heed3a)]·H<sub>2</sub>O (**5**)

Figure S4. Raman spectra of (NH<sub>4</sub>)[Ti(O<sub>2</sub>)(Hpdt)]·H<sub>2</sub>O (**1**) and (NH<sub>4</sub>)<sub>3</sub>[Ti(O<sub>2</sub>)(pdta)H(pdta)(O<sub>2</sub>)Ti]·7H<sub>2</sub>O (**2**)

Figure S5. <sup>13</sup>C NMR spectrum of (NH<sub>4</sub>)[Ti(O<sub>2</sub>)(ed3a)]

Figure S6. <sup>13</sup>C NMR spectrum of reaction solution for (NH<sub>4</sub>)[Ti(O<sub>2</sub>)(pd3a)]·H<sub>2</sub>O (**3**)

Figure S7. <sup>13</sup>C NMR and <sup>1</sup>H NMR spectra of blank experiment of oxidation pyridine at 80°C. Reaction conditions: pyridine 1g, 30% H<sub>2</sub>O<sub>2</sub> 3ml, reaction time 24h.

Figure S8. <sup>13</sup>C NMR spectra for the oxidation of pyridine at 80 °C. Reaction conditions: pyridine (1.0 g), 30% H<sub>2</sub>O<sub>2</sub> (3.0 mL), catalyst **2** (7.5 mol% ).

Scheme S1. Catalytic reaction for the oxidation of pyridine.

Table S1. Crystallographic data and structural refinements for (NH<sub>4</sub>)[Ti(O<sub>2</sub>)(Hpdt)]·H<sub>2</sub>O (**1**), (NH<sub>4</sub>)<sub>3</sub>[Ti(O<sub>2</sub>)(pdta)H(pdta)(O<sub>2</sub>)Ti]·7H<sub>2</sub>O (**2**), (NH<sub>4</sub>)[Ti(O<sub>2</sub>)(pd3a)]·H<sub>2</sub>O (**3**) and (NH<sub>4</sub>)[Ti(O<sub>2</sub>)(Heed3a)]·H<sub>2</sub>O (**5**).

Table S2. Selected bond distances and angles for (NH<sub>4</sub>)[Ti(O<sub>2</sub>)(Hpdt)]·H<sub>2</sub>O (**1**), (NH<sub>4</sub>)<sub>3</sub>[Ti(O<sub>2</sub>)(pdta)H(pdta)(O<sub>2</sub>)Ti]·7H<sub>2</sub>O (**2**), (NH<sub>4</sub>)[Ti(O<sub>2</sub>)(pd3a)]·H<sub>2</sub>O (**3**) and (NH<sub>4</sub>)[Ti(O<sub>2</sub>)(Heed3a)]·H<sub>2</sub>O (**5**).

Table S3. Geometrical parameters of hydrogen bonds in (NH<sub>4</sub>)[Ti(O<sub>2</sub>)(Hpdt)]·H<sub>2</sub>O (**1**), (NH<sub>4</sub>)<sub>3</sub>[Ti(O<sub>2</sub>)(pdta)H(pdta)(O<sub>2</sub>)Ti]·7H<sub>2</sub>O (**2**) and (NH<sub>4</sub>)[Ti(O<sub>2</sub>)(Heed3a)]·H<sub>2</sub>O (**5**)

Table S4. Relevant <sup>13</sup>C NMR data of H<sub>4</sub>edta, (NH<sub>4</sub>)[Ti(O<sub>2</sub>)(Hedta)]·2H<sub>2</sub>O, (NH<sub>4</sub>)<sub>2</sub>[Ti(O<sub>2</sub>)(edta)]·2H<sub>2</sub>O and (NH<sub>4</sub>)[Ti(O<sub>2</sub>)(ed3a)]

Figure S1

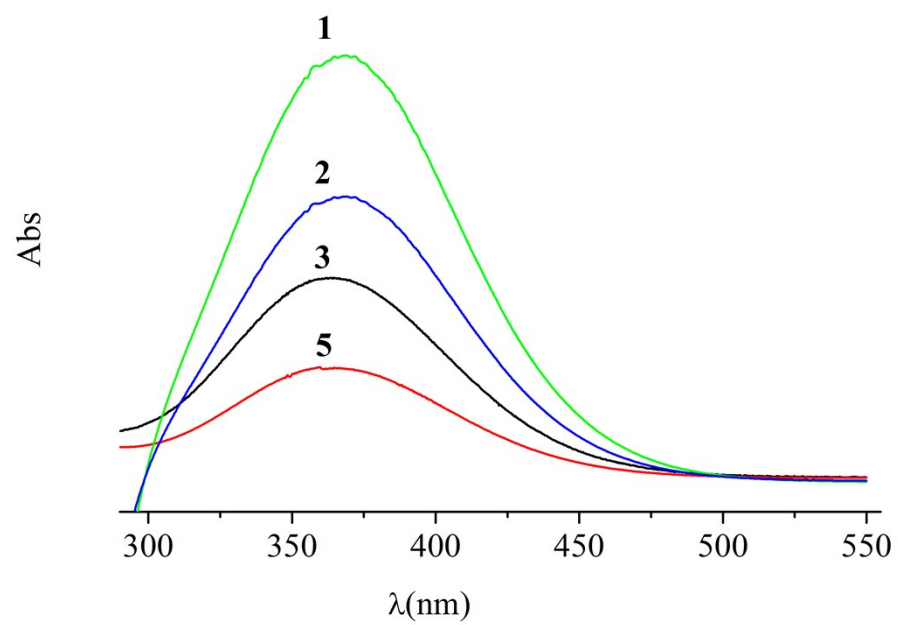

Figure S2

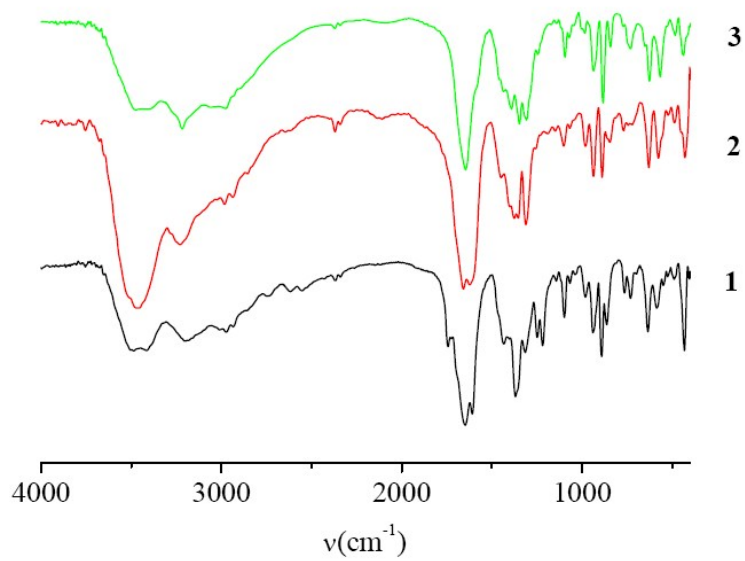

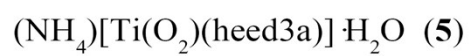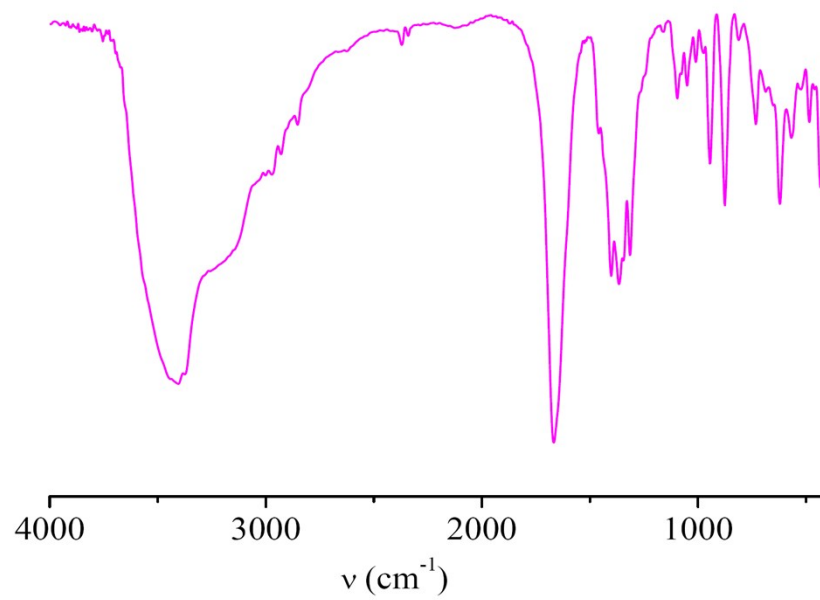

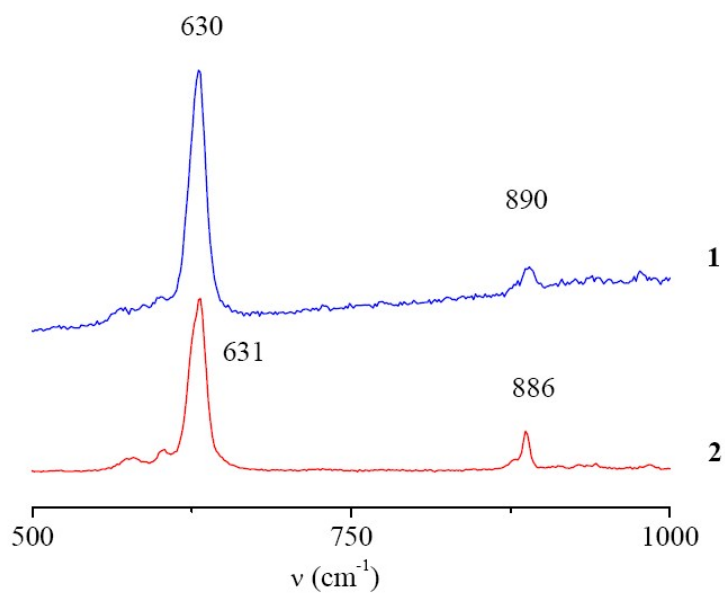

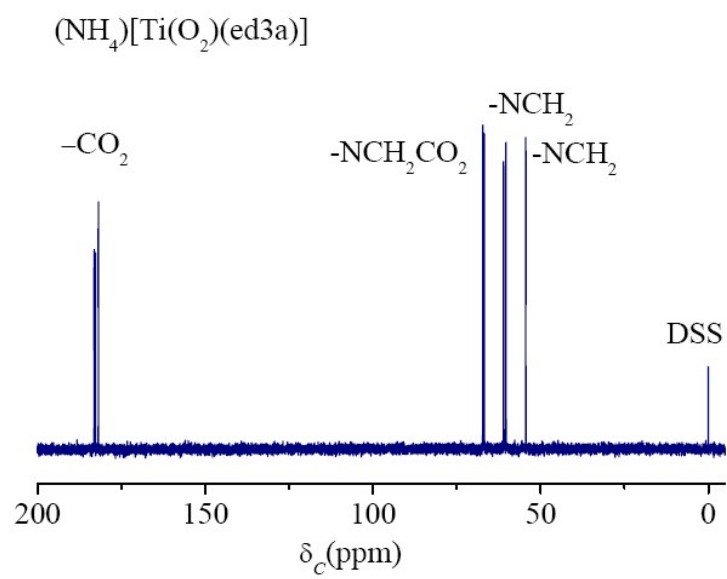

Figure S6

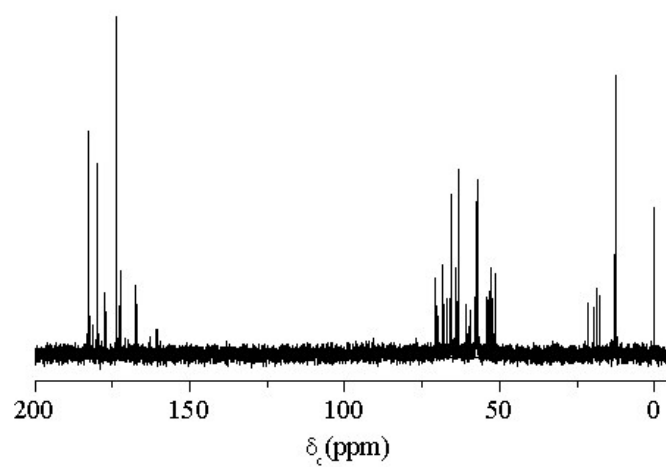

Figure S7

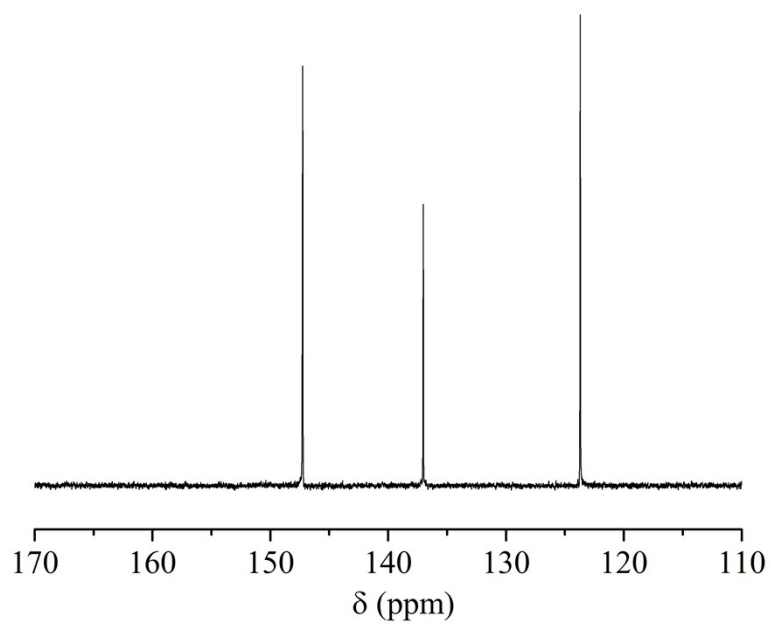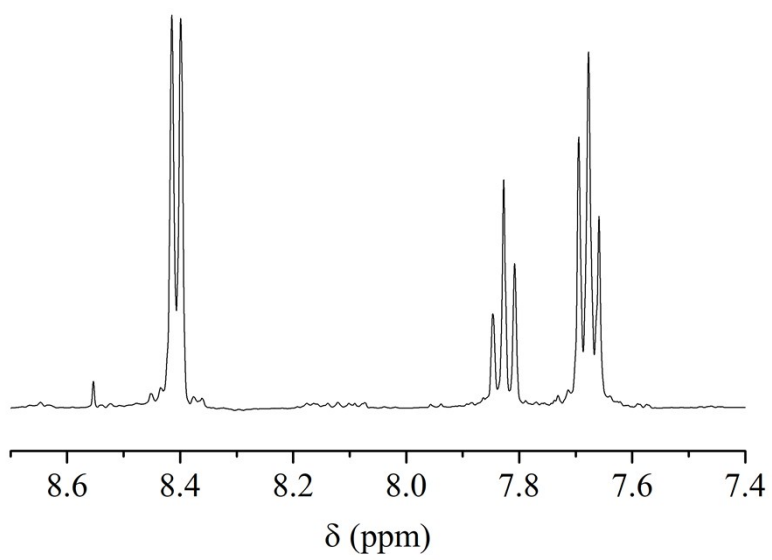



Figure S8

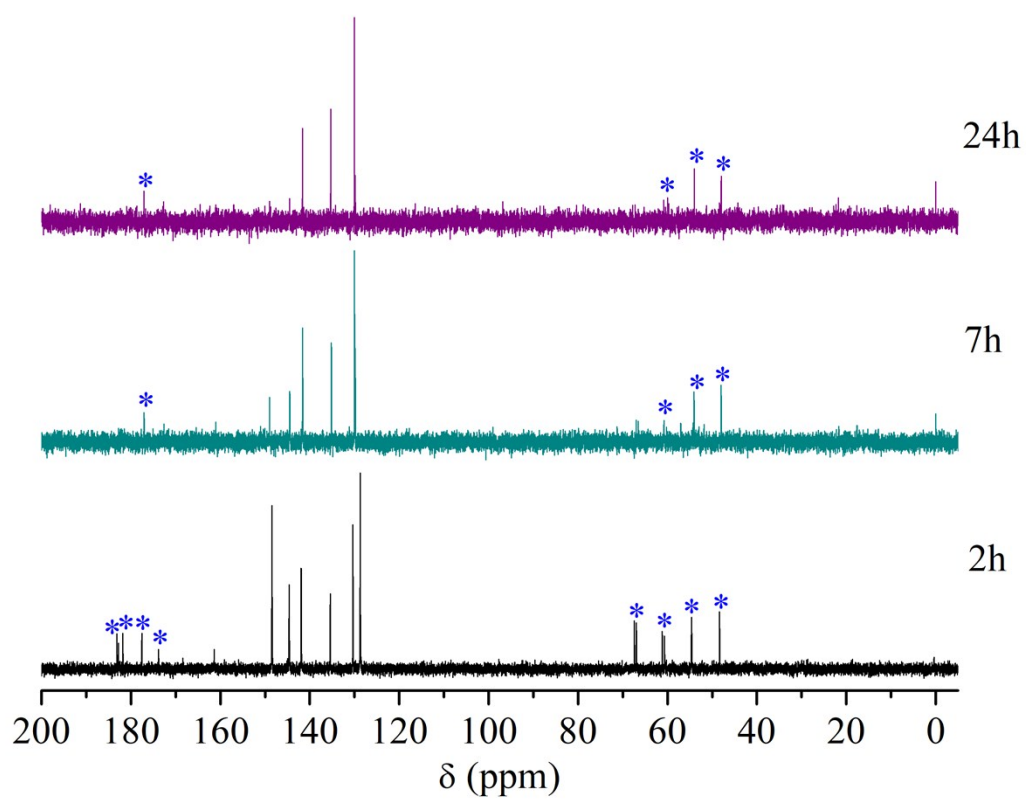

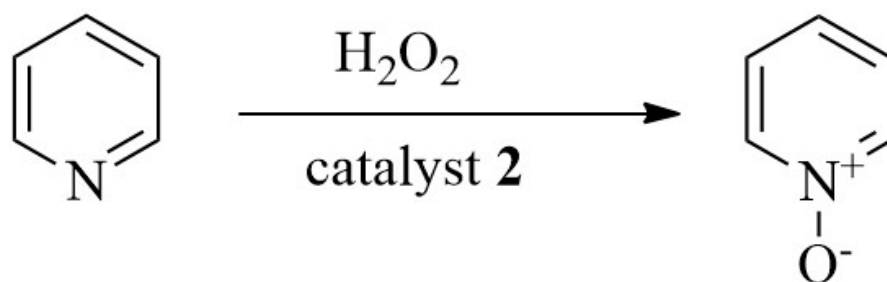

Table S1. Crystal data summaries of intensity data collections and structure refinements for (NH<sub>4</sub>)[Ti(O<sub>2</sub>)(Hpdtta)]·H<sub>2</sub>O (**1**), (NH<sub>4</sub>)<sub>3</sub>[Ti(O<sub>2</sub>)(pdta)H(pdta)(O<sub>2</sub>)Ti]·7H<sub>2</sub>O (**2**), (NH<sub>4</sub>)[Ti(O<sub>2</sub>)(pd3a)]·H<sub>2</sub>O (**3**) and (NH<sub>4</sub>)[Ti(O<sub>2</sub>)(Heed3a)]·H<sub>2</sub>O (**5**)

|                                                                                        | <b>1</b>                                                          | <b>2</b>                                                          | <b>3</b>                                                        | <b>5</b>                                                          |
|----------------------------------------------------------------------------------------|-------------------------------------------------------------------|-------------------------------------------------------------------|-----------------------------------------------------------------|-------------------------------------------------------------------|
| Empirical formula                                                                      | C <sub>11</sub> H <sub>21</sub> N <sub>3</sub> O <sub>11</sub> Ti | C <sub>22</sub> H <sub>55</sub> N <sub>7</sub> O <sub>27</sub> Ti | C <sub>9</sub> H <sub>19</sub> N <sub>3</sub> O <sub>9</sub> Ti | C <sub>10</sub> H <sub>21</sub> N <sub>3</sub> O <sub>10</sub> Ti |
| Formula weight                                                                         | 419.21                                                            | 945.47                                                            | 361.17                                                          | 391.20                                                            |
| Crystal system                                                                         | Triclinic                                                         | Monoclinic                                                        | Monoclinic                                                      | Monoclinic                                                        |
| <i>a</i> /Å                                                                            | 6.6948(3)                                                         | 23.00(1)                                                          | 16.1839(6)                                                      | 7.9665(1)                                                         |
| <i>b</i> /Å                                                                            | 7.5422(4)                                                         | 12.077(1)                                                         | 11.1970(4)                                                      | 30.1390(3)                                                        |
| <i>c</i> /Å                                                                            | 16.7297(8)                                                        | 16.442(9)                                                         | 15.8291(6)                                                      | 13.2150(1)                                                        |
| <i>α</i> /°                                                                            | 83.398(4)                                                         |                                                                   |                                                                 |                                                                   |
| <i>β</i> /°                                                                            | 85.937(4)                                                         | 124.99(4)                                                         | 103.231(4)                                                      | 104.765(1)                                                        |
| <i>γ</i> /°                                                                            | 77.802(4)                                                         |                                                                   |                                                                 |                                                                   |
| Unit cell volume/Å <sup>3</sup>                                                        | 819.25(7)                                                         | 3741(3)                                                           | 2792.3(2)                                                       | 3068.18(6)                                                        |
| Space group                                                                            | <i>P</i> $\bar{1}$                                                | <i>C</i> 2/ <i>c</i>                                              | <i>C</i> 2/ <i>c</i>                                            | <i>P</i> 2 <sub>1</sub> / <i>a</i>                                |
| No. of units per unit cell, <i>Z</i>                                                   | 2                                                                 | 4                                                                 | 8                                                               | 8                                                                 |
| Temperature, K                                                                         |                                                                   |                                                                   | 173(2)                                                          |                                                                   |
| Radiation type                                                                         |                                                                   |                                                                   | Mo K $\alpha$                                                   |                                                                   |
| <i>D</i> <sub>calc</sub> (g·cm <sup>-3</sup> )                                         | 1.699                                                             | 1.679                                                             | 1.713                                                           | 1.694                                                             |
| Absorption coefficient, $\mu$ /mm <sup>-1</sup>                                        | 0.590                                                             | 0.537                                                             | 0.666                                                           | 0.618                                                             |
| No. of reflections measured                                                            | 10186                                                             | 8458                                                              | 10553                                                           | 23075                                                             |
| No. of independent reflections                                                         | 5294                                                              | 4114                                                              | 3195                                                            | 4575                                                              |
| <i>R</i> <sub>int</sub>                                                                | 0.0425                                                            | 0.0975                                                            | 0.0443                                                          | 0.0203                                                            |
| Final <i>R</i> <sub><i>I</i></sub> values [ <i>I</i> > 2 $\sigma$ ( <i>I</i> )]        | 0.0348                                                            | 0.0849                                                            | 0.0346                                                          | 0.0129                                                            |
| Final <i>wR</i> ( <i>F</i> <sup>2</sup> ) values [ <i>I</i> > 2 $\sigma$ ( <i>I</i> )] | 0.0599                                                            | 0.1097                                                            | 0.0720                                                          | 0.0341                                                            |
| Final <i>R</i> <sub><i>I</i></sub> values (all data)                                   | 0.0816                                                            | 0.1521                                                            | 0.0565                                                          | 0.0881                                                            |
| Final <i>wR</i> ( <i>F</i> <sup>2</sup> ) values (all data)                            | 0.0651                                                            | 0.1326                                                            | 0.0759                                                          | 0.0369                                                            |
| Goodness of fit on <i>F</i> <sup>2</sup>                                               | 0.787                                                             | 1.049                                                             | 0.958                                                           | 0.0896                                                            |
| Largest diff. peak and hole (e·Å <sup>-3</sup> )                                       | 0.33/-0.36                                                        | 0.51/-0.59                                                        | 0.76/-0.27                                                      | 0.78/-0.52                                                        |

Table S2. Selected bond distances (Å) and angles (°) for (NH<sub>4</sub>)[Ti(O<sub>2</sub>)(HpdtA)]·H<sub>2</sub>O (**1**), (NH<sub>4</sub>)<sub>3</sub>[Ti(O<sub>2</sub>)(pdta)H(pdta)(O<sub>2</sub>)Ti]·7H<sub>2</sub>O (**2**), (NH<sub>4</sub>)[Ti(O<sub>2</sub>)(pd3a)]·H<sub>2</sub>O (**3**) and (NH<sub>4</sub>)[Ti(O<sub>2</sub>)(Heed3a)]·H<sub>2</sub>O (**5**).

| Compd.           | <b>1</b>  | <b>2</b> | <b>3</b>  | <b>5</b>  |
|------------------|-----------|----------|-----------|-----------|
| Bond lengths (Å) |           |          |           |           |
| Ti (1)—O(1)      | 2.069(1)  | 1.954(4) | 1.962(1)  | 2.048(2)  |
| Ti (1)—O(3)      | 1.996(1)  | 2.066(3) | 2.015(1)  | 1.979(2)  |
| Ti (1)—O(5)      | 1.944(1)  | 1.982(4) | 1.976(1)  | 1.962(2)  |
| Ti (1)—O(7)      |           |          | 1.881(2)  |           |
| Ti (1)—O(8)      |           |          | 1.854(2)  | 1.865(2)  |
| Ti (1)—O(9)      | 1.844(1)  | 1.835(3) |           | 1.850(2)  |
| Ti (1)—O(10)     | 1.862(1)  | 1.856(3) |           |           |
| Ti (1)—O(1w)     |           |          |           |           |
| Ti (1)—N(1)      | 2.280(1)  | 2.318(4) | 2.301(2)  | 2.286(2)  |
| Ti (1)—N(2)      | 2.284(1)  | 2.285(4) | 2.204(2)  | 2.272(2)  |
| Bond angles (°)  |           |          |           |           |
| O(1)—Ti(1)—O(3)  | 92.19(4)  | 96.3(1)  | 98.62(6)  | 94.00(7)  |
| O(1)—Ti(1)—O(5)  | 93.40(5)  | 157.2(1) | 160.88(6) | 90.90(7)  |
| O(1)—Ti(1)—O(7)  |           |          | 93.49(6)  |           |
| O(1)—Ti(1)—O(8)  |           |          | 98.97(6)  | 81.03(8)  |
| O(1)—Ti(1)—O(9)  | 127.00(5) | 100.7(2) |           | 127.51(8) |
| O(1)—Ti(1)—O(10) | 80.48(5)  | 94.5(2)  |           |           |
| O(1)—Ti(1)—O(1w) |           |          |           |           |
| O(1)—Ti(1)—N(1)  | 73.66(4)  | 76.2(1)  | 77.48(6)  | 73.72(7)  |
| O(1)—Ti(1)—N(2)  | 151.00(5) | 89.1(2)  | 86.89(6)  | 150.37(7) |
| O(3)—Ti(1)—O(5)  | 158.06(4) | 86.2(1)  | 88.59(6)  | 156.95(7) |
| O(3)—Ti(1)—O(7)  |           |          | 128.79(6) |           |
| O(3)—Ti(1)—O(8)  |           |          | 82.50(6)  | 101.20(8) |
| O(3)—Ti(1)—O(9)  | 93.84(5)  | 81.6(2)  |           | 94.84(8)  |
| O(3)—Ti(1)—O(10) | 99.56(5)  | 128.1(1) |           |           |
| O(3)—Ti(1)—O(1w) |           |          |           |           |
| O(3)—Ti(1)—N(1)  | 77.51(5)  | 73.4(1)  | 74.81(6)  | 77.04(8)  |
| O(3)—Ti(1)—N(2)  | 87.42(4)  | 148.4(1) | 149.09(6) | 86.96(7)  |
| O(5)—Ti(1)—O(7)  |           |          | 95.71(6)  |           |
| O(5)—Ti(1)—O(8)  |           |          | 99.52(6)  | 101.81(7) |
| O(5)—Ti(1)—O(9)  | 99.64(5)  | 102.0(2) |           | 99.99(8)  |
| O(5)—Ti(1)—O(10) | 102.29(5) | 101.7(2) |           |           |
| O(5)—Ti(1)—O(1w) |           |          |           |           |
| O(5)—Ti(1)—N(1)  | 83.72(5)  | 82.9(1)  | 87.49(6)  | 82.77(7)  |
| O(5)—Ti(1)—N(2)  | 77.51(5)  | 77.6(1)  | 78.22(6)  | 77.90(7)  |
| O(7)—Ti(1)—O(8)  |           |          | 46.42(6)  |           |
| O(7)—Ti(1)—O(9)  |           |          |           |           |
| O(7)—Ti(1)—O(10) |           |          |           |           |
| O(7)—Ti(1)—O(1w) |           |          |           |           |
| O(7)—Ti(1)—N(1)  |           |          | 156.14(6) |           |
| O(7)—Ti(1)—N(2)  |           |          | 80.74(6)  |           |
| O(1w)—Ti(1)—N(1) |           |          |           |           |

|                  |           |          |           |           |
|------------------|-----------|----------|-----------|-----------|
| O(1w)—Ti(1)—N(2) |           |          |           |           |
| O(8)—Ti(1)—O(9)  |           |          |           | 46.50(8)  |
| O(8)—Ti(1)—N(1)  |           |          | 156.10(6) | 154.44(8) |
| O(8)—Ti(1)—N(2)  |           |          | 126.94(7) | 127.87(8) |
| O(9)—Ti(1)—O(10) | 46.59(5)  | 46.5(1)  |           |           |
| O(9)—Ti(1)—N(1)  | 158.38(5) | 154.3(2) |           | 158.22(8) |
| O(9)—Ti(1)—N(2)  | 81.92(5)  | 128.0(1) |           | 81.77(7)  |
| O(10)—Ti(1)—N(1) | 153.79(5) | 157.9(2) |           |           |
| O(10)—Ti(1)—N(2) | 128.18(5) | 82.2(1)  |           |           |
| N(1)—Ti(1)—N(2)  | 77.96(5)  | 77.7(1)  | 76.77(6)  | 77.68(7)  |

Table S3. Geometrical parameters of hydrogen bonds (Å, degree) in (NH<sub>4</sub>)[Ti(O<sub>2</sub>)(HpdtA)]·H<sub>2</sub>O (**1**), (NH<sub>4</sub>)<sub>3</sub>[Ti(O<sub>2</sub>)(pdta)H(pdta)(O<sub>2</sub>)Ti]·7H<sub>2</sub>O (**2**) and (NH<sub>4</sub>)[Ti(O<sub>2</sub>)(Heed3a)]·H<sub>2</sub>O (**5**)

| Complexs. | D—H···A     | D—H (Å)  | H···A (Å) | D···A (Å) | D—H···A(°) |
|-----------|-------------|----------|-----------|-----------|------------|
| <b>1</b>  | O7—H···O1w  | 0.756(2) | 1.798(2)  | 2.548(2)  | 171(3)     |
| <b>2</b>  | O7—H···O7a  | 1.225(3) | 1.225(3)  | 2.450(6)  | 180(1)     |
| <b>5</b>  | O7—H···O16a | 0.839(2) | 2.004(8)  | 2.838(3)  | 172(8)     |
|           | O17—H···O6b | 0.826(3) | 2.032(2)  | 2.790(3)  | 152(8)     |

Symmetric transformation for **2**:  $a, \frac{1}{2} - x, -\frac{1}{2} - y, 1 - z$ ; **5**:  $a, 1 + x, y, z$ ; **b**:  $\frac{1}{2} + x, \frac{1}{2} - y, 1 + z$

Table S4. Relevant <sup>13</sup>C NMR data, δ/ppm of H<sub>4</sub>edta, (NH<sub>4</sub>)[Ti(O<sub>2</sub>)(Hedta)]·2H<sub>2</sub>O, (NH<sub>4</sub>)<sub>2</sub>[Ti(O<sub>2</sub>)(edta)]·2H<sub>2</sub>O and (NH<sub>4</sub>)[Ti(O<sub>2</sub>)(ed3a)]

| Compounds.                                                                                  | —CH <sub>2</sub> N | —NCH <sub>2</sub> CO <sub>2</sub> | —COOH / CH <sub>2</sub> CO <sub>2</sub> |
|---------------------------------------------------------------------------------------------|--------------------|-----------------------------------|-----------------------------------------|
| H <sub>4</sub> edta                                                                         | 51.3               | 54.6                              | 172.0                                   |
| (NH <sub>4</sub> )[Ti(O <sub>2</sub> )(Hedta)]·2H <sub>2</sub> O <sup>11</sup>              | 59.7               | 66.1(11.5)                        | 179.9(7.9)                              |
| (NH <sub>4</sub> ) <sub>2</sub> [Ti(O <sub>2</sub> )(edta)]·2H <sub>2</sub> O <sup>11</sup> | 60.3               | 66.7(12.1)                        | 180.4(8.4)                              |
| (NH <sub>4</sub> )[Ti(O <sub>2</sub> )(ed3a)] <sup>11</sup>                                 | 54.4, 60.3, 61.0   | 66.8, 67.2                        | 181.8, 182.8, 183.1                     |

Δδ values are given in parentheses.
